# Supplementary material for: Ultrasensitive detection of acephate based on carbon quantum dot-mediated fluorescence inner filter effects
Source: Royal Society of Chemistry journal article supplement (doi:10.1039/d2an01552h), 2022-01-01
Supplement: d2an01552h1.pdf [file d2an01552h1.pdf]

## Supporting Information

### Ultrasensitive detection of acephate based on carbon quantum dots-mediated fluorescence inner filter effects

Haiqin Li,<sup>†</sup> Rong Deng,<sup>†</sup> Hamed Tavakoli,<sup>‡</sup> Xiaochun Li,<sup>†,\*</sup> and XiuJun Li<sup>‡,\*</sup>

<sup>†</sup> *Institute of Biomedical Precision Testing and Instrumentation, College of Biomedical Engineering, Taiyuan University of Technology, Jinzhong 030600, P.R. China*

<sup>‡</sup> *Department of Chemistry and Biochemistry, Forensic Science, & Environmental Science & Engineering, University of Texas at El Paso, 500 W University Ave, El Paso, Texas 79968, United States*

\* Corresponding authors. [lixiaochun@tyut.edu.cn](mailto:lixiaochun@tyut.edu.cn) (XC. Li); [xli4@utep.edu](mailto:xli4@utep.edu) (XJ. Li).

XPS characterization of Ag<sup>+</sup>-Thiocholine polymers and high-resolution TEM of CQDs characterization.

## 1. XPS analysis

$\text{Ag}^+$  plays a crucial role in the formation of DAP and thus the induction of IFE. Thiocholine is formed under the catalysis of acetylcholinesterase, and the hydrolysate thiocholine can bind with  $\text{Ag}^+$  to form a complex to inhibit IFE. Organophosphorus residue can inhibit the acetylcholinesterase activity, leading to stronger IFE effects. To further explore the mechanism, XPS was applied to characterize the formation of the complex between  $\text{Ag}^+$  and thiocholine. Figure S1 shows the XPS characterization of thiocholine in the presence and absence of  $\text{Ag}^+$ . Figure S1 (b) XPS measurement shows the chemical state of  $\text{Ag}^+$ -Thiocholine polymers. Compared with Figure S1 (a), Ag 3d binding peaks were measured at 368.2 eV ( $3d_{5/2}$ ) and 374.2 eV ( $3d_{3/2}$ ) [1]. Figure S1 (c) shows the quantitative data of XPS. After incubation with  $\text{Ag}^+$ , the content of Ag increased, but the content of C and S decreased, indicating that thiocholine containing thiol group (-SH) and  $\text{Ag}^+$  formed a linear metal polymer [2,3].

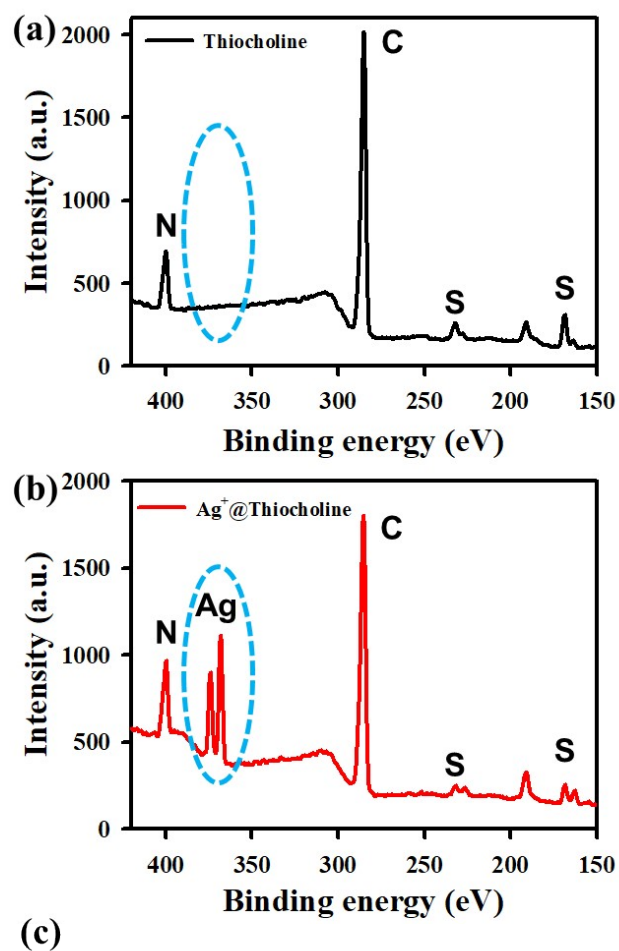

| Element (atomic, %)          | Ag   | N     | C     | S    |
|------------------------------|------|-------|-------|------|
| Thiocholine                  | 0    | 9.61  | 86.37 | 4.02 |
| Ag <sup>+</sup> @Thiocholine | 2.15 | 10.67 | 83.98 | 3.20 |

**Figure S1.** XPS characterization of Thiocholine (a) and Ag<sup>+</sup>@ Thiocholine(b). (c)XPS quantitative data of Thiocholine before and after incubation with Ag<sup>+</sup>.

## 2. CQDs TEM analysis

It can be seen from the Figure S2 that the size of CQDs is about 3~5 nm.

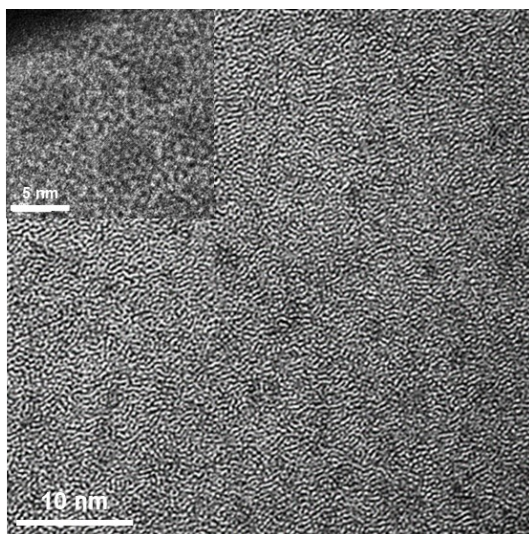

**Figure S2.** TEM image of the CQDs.

## References

- [1] N. Feng, Q. Wang, A. Zheng, Z. Zhang, J. Fan, S. Liu, J.-P. Amoureux, F. Deng, Understanding the High Photocatalytic Activity of (B, Ag)-Codoped TiO<sub>2</sub> under Solar-Light Irradiation with XPS, Solid-State NMR, and DFT Calculations, *J. Am. Chem. Soc.*, 2013, 135, 1607-1616.
- [2] D. Li, J. Shen, N. Chen, Y. Ruan, Y. Jiang, A ratiometric luminescent sensing of Ag<sup>+</sup> ion via in situ formation of coordination polymers, *Chem. Commun.*, 2011, 47, 5900–5902.
- [3] D. Tao, Q. Wang, X. Yan, N. Chen, Z. Li, Y. Jiang, Ag<sup>+</sup> coordination polymers of a chiral thiol ligand bearing an AIE fluorophore, *Chem. Commun.*, 2017, 53, 255-258.
